# Supplementary material for: Global fitness profiling of fission yeast deletion strains by barcode sequencing
Source: Springer Nature journal article supplement (doi:10.1186/gb-2010-11-6-r60), 2010-06-10
Supplement: Additional file 18 [file gb-2010-11-6-r60-s18.pdf]

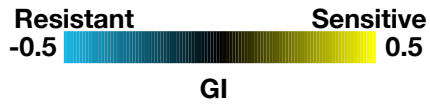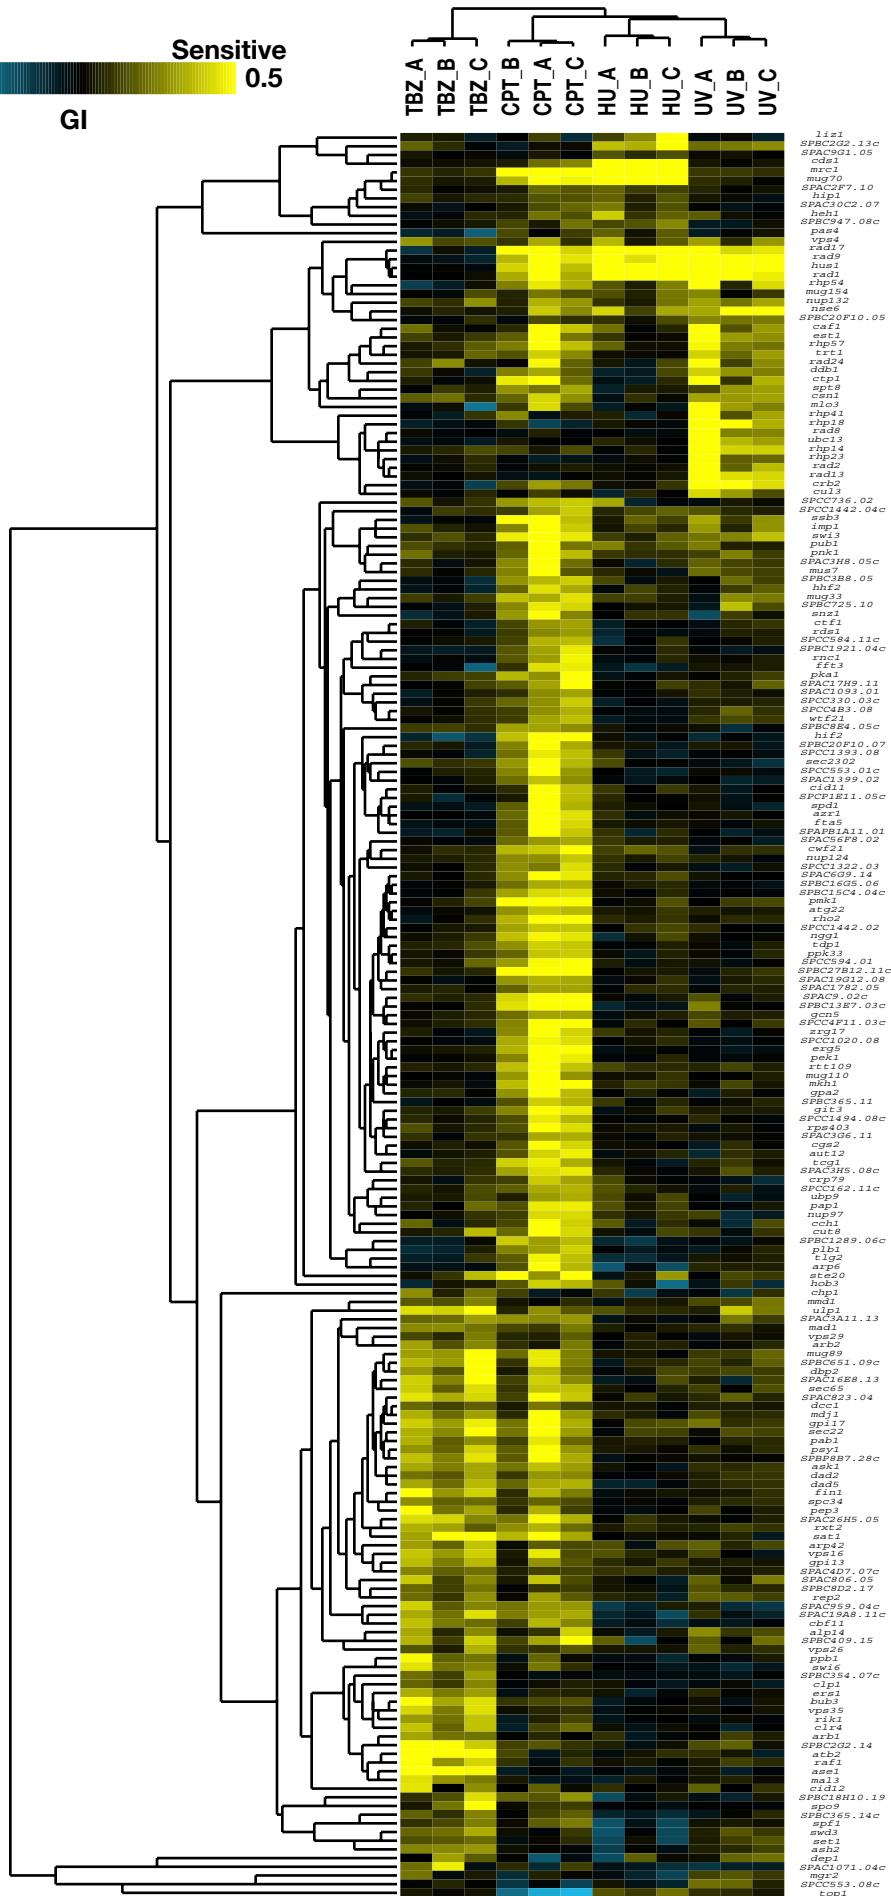

Supplementary Figure 4. The full heat map of the hierarchical clustering analysis shown in Figure 4E.
